# Supplementary material for: Green synthesis of silver nanoparticles with enhanced antibacterial activity using holocellulose as a substrate and reducing agent
Source: Royal Society of Chemistry journal article supplement (doi:10.1039/c5ra27421d), 2016-01-01
Supplement: c5ra27421d1.pdf [file c5ra27421d1.pdf]

## Support information

### Green synthesis of silver nanoparticles with enhanced antibacterial activity using holocellulose as substrate and reducing agent

Lian-Hua Fu,<sup>a</sup> Fu Deng,<sup>a</sup> Ming-Guo Ma,<sup>a\*</sup> Jun Yang<sup>a\*</sup>

<sup>a</sup>Beijing Key Laboratory of Lignocellulosic Chemistry, College of Materials Science and Technology, Beijing Forestry University, Beijing 100083, PR China

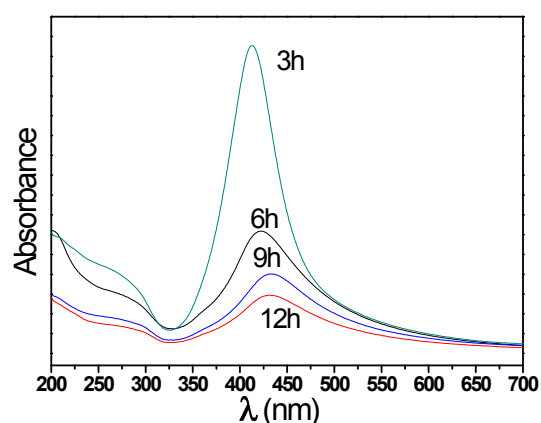

Fig. S1. UV-vis adsorption spectra of the samples HC/Ag-3, 6, 9, and 12.

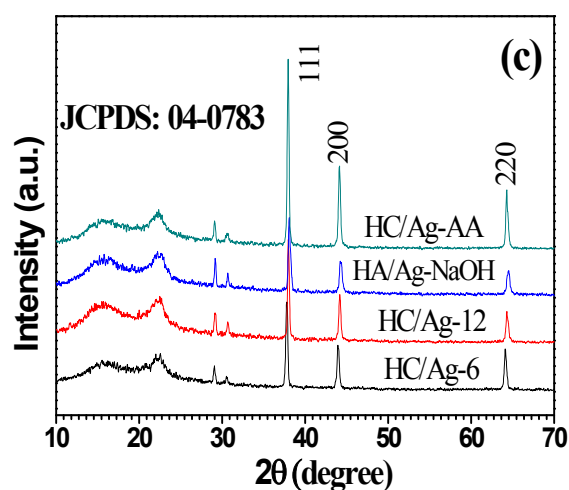

Fig. S2. XRD patterns of the samples after TG analysis.

\* Corresponding author. Tel.: +86-10-62337250; Fax.: +86-10-62336903.  
E-mail address: mg\_ma@bjfu.edu.cn (M.-G. Ma), , yangjun11@bjfu.edu.cn

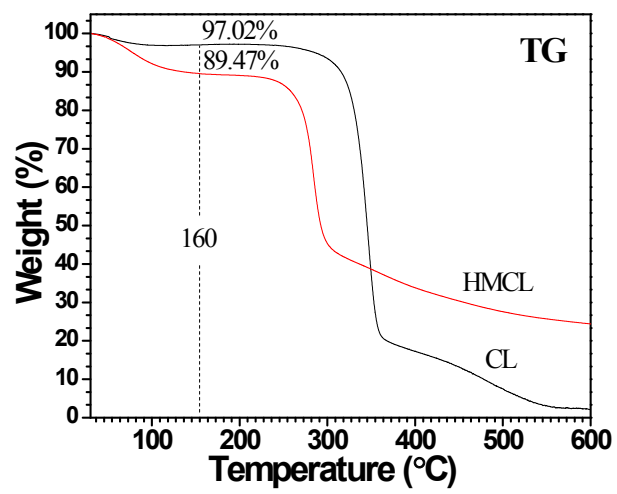

Fig. S3. TG curves of HMCL and CL.
